# Supplementary material for: Analysis of the Acute Toxicity Effects of Bifenthrin on Chinese Giant Salamander (Andrias davidianus) Larvae
Source: Preprints.org preprint supplement (doi:10.20944/preprints202310.0602.v2), 2023-10-13

Table.1. Acute effect of bifenthrin on giant salamander larvae

| BF concentration<br>(µg/L) | average mortality |     |     |     | LC <sub>50</sub> and 95% confidence interval (µg/L) |             |            |            | SC (µg/L) |
|----------------------------|-------------------|-----|-----|-----|-----------------------------------------------------|-------------|------------|------------|-----------|
|                            | 24h               | 48h | 72h | 96h | 24 h                                                | 48 h        | 72 h       | 96 h       |           |
| 6.25                       | 0                 | 0   | 33  | 33  |                                                     |             |            |            |           |
| 12.5                       | 0                 | 17  | 50  | 50  | 50                                                  | 27.4        | 12.5       | 9.9        | 2.47      |
| 25                         | 0                 | 17  | 67  | 100 | (31.3-79.9)                                         | (18.2-42.7) | (7.6-20.9) | (6.8-14.4) |           |
| 50                         | 50                | 100 | 100 | 100 |                                                     |             |            |            |           |

Table.2. Trends of different physiological parameters in brain, liver, and Kidney in response to concentration.

|       | Trendline formula       | r <sup>2</sup> value |         | Trendline formula       | r <sup>2</sup> value |
|-------|-------------------------|----------------------|---------|-------------------------|----------------------|
| ATP_B | $y = -0.0755x + 0.4131$ | $R^2 = 0.931$        | GSH_L   | $y = -0.0209x + 0.0731$ | $R^2 = 0.8685$       |
| ATP_L | $y = -0.0106x + 0.0379$ | $R^2 = 0.8799$       | ROS_L   | $y = 0.4x + 0.6271$     | $R^2 = 0.995$        |
| ATP_K | $y = -0.0829x + 0.5667$ | $R^2 = 0.9573$       | ROS_K   | $y = 0.4864x + 0.468$   | $R^2 = 0.9712$       |
| SOD_K | $y = -0.0785x + 0.2643$ | $R^2 = 0.8854$       | ROS_B   | $y = 0.5165x + 0.4052$  | $R^2 = 0.9399$       |
| SOD_L | $y = -0.0267x + 0.1047$ | $R^2 = 0.8218$       | CAT_L   | $y = -0.0375x + 0.1615$ | $R^2 = 0.9167$       |
| SOD_B | $y = -0.0266x + 0.1724$ | $R^2 = 0.9779$       | CAT_B   | $y = -0.0221x + 0.1306$ | $R^2 = 0.9338$       |
| MDA_K | $y = 0.004x + 0.0076$   | $R^2 = 0.9905$       | CAT_K   | $y = -0.0279x + 0.1293$ | $R^2 = 0.9673$       |
| MDA_L | $y = 0.005x + 0.0059$   | $R^2 = 0.9954$       | 8OHdG_L | $y = 0.4064x + 0.2127$  | $R^2 = 0.9342$       |
| MDA_B | $y = 0.0137x + 0.0246$  | $R^2 = 0.9869$       | 8OHdG_K | $y = 0.4601x + 1.2092$  | $R^2 = 0.9976$       |
| GSH_K | $y = -0.0208x + 0.0718$ | $R^2 = 0.9063$       | 8OHdG_B | $y = 0.6372x + 0.6869$  | $R^2 = 0.9528$       |
| GSH_B | $y = -0.0219x + 0.0746$ | $R^2 = 0.9171$       |         |                         |                      |

Table.3 Quality of sequencing sample

| Sample | RawData(bp) | CleanData(bp) | BF_Q20(%)           | BF_Q30(%)           | BF_N(%)        | BF_GC(%)            |
|--------|-------------|---------------|---------------------|---------------------|----------------|---------------------|
| C1     | 8570323500  | 8497016973    | 8355229789 (97.49%) | 7983356593 (93.15%) | 10573 (0.00%)  | 4077935926 (47.58%) |
| C2     | 7961443200  | 7884980846    | 7793418743 (97.89%) | 7492472384 (94.11%) | 9793 (0.00%)   | 3840803534 (48.24%) |
| C3     | 6180859800  | 6105641190    | 6025557130 (97.49%) | 5771472897 (93.38%) | 118099 (0.00%) | 3026098542 (48.96%) |
| L1     | 7345199100  | 7274677825    | 7145634845 (97.28%) | 6803656228 (92.63%) | 440332 (0.01%) | 3484409085 (47.44%) |
| L2     | 8742854100  | 8652131352    | 8529881816 (97.56%) | 8169319937 (93.44%) | 10794 (0.00%)  | 4272687470 (48.87%) |
| L3     | 6757273800  | 6685690560    | 6590896525 (97.54%) | 6309314726 (93.37%) | 8150 (0.00%)   | 3268687270 (48.37%) |
| H1     | 6501689700  | 6423849792    | 6344224703 (97.58%) | 6079349482 (93.50%) | 6252 (0.00%)   | 3173485621 (48.81%) |
| H2     | 6997675200  | 6924181647    | 6848480651 (97.87%) | 6587767854 (94.14%) | 6671 (0.00%)   | 3363836583 (48.07%) |
| H3     | 6005677500  | 5932246189    | 5878549135 (97.88%) | 5654044512 (94.14%) | 5660 (0.00%)   | 2893276454 (48.18%) |

Table.4 Gene annotation success rate statistics

|                         | Number of Unigenes | Percentage(%) |
|-------------------------|--------------------|---------------|
| Nr                      | 30931              | 35.17         |
| KEGG                    | 29913              | 34.01         |
| KOG                     | 15458              | 17.57         |
| SwissProt               | 19999              | 22.74         |
| annotation genes        | 31728              | 36.07         |
| without annotation gene | 56230              | 63.93         |
| Total Unigenes          | 87958              | 100.00        |

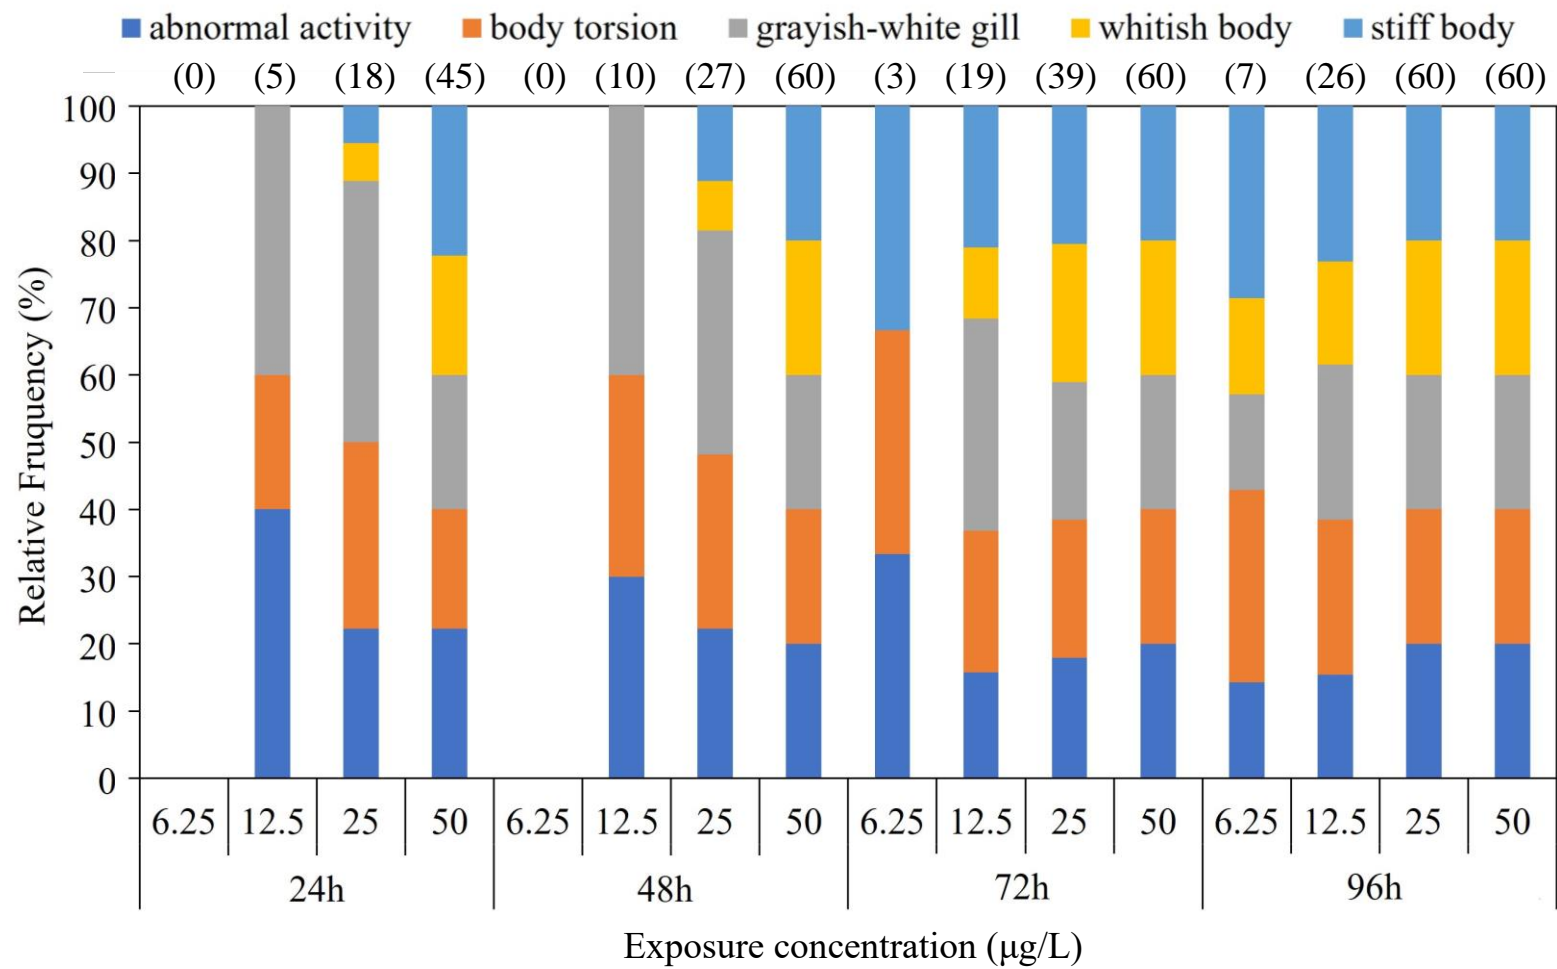

(A)

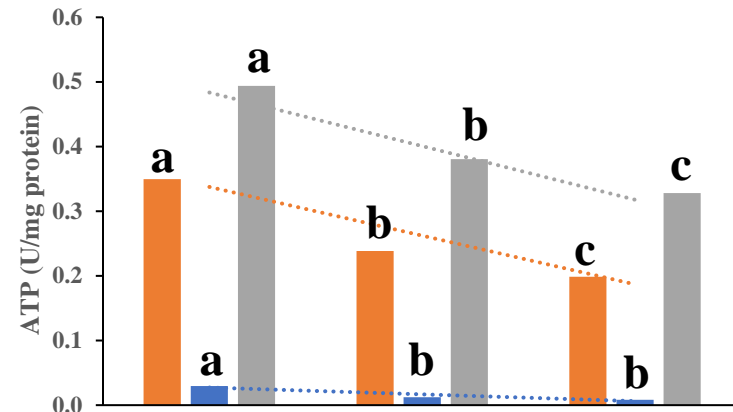

(B)

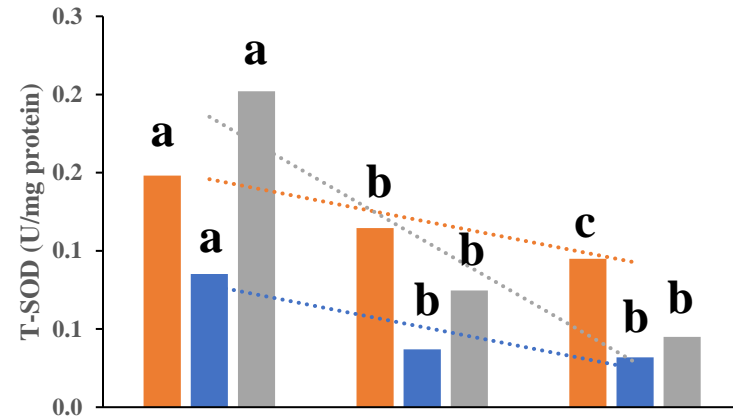

(C)

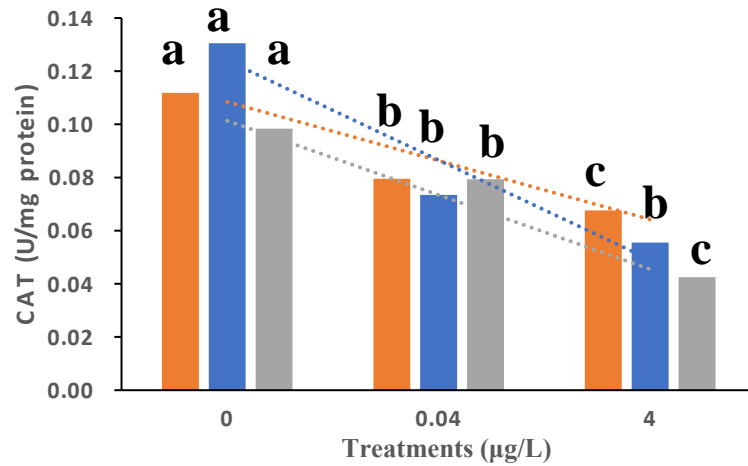

(D)

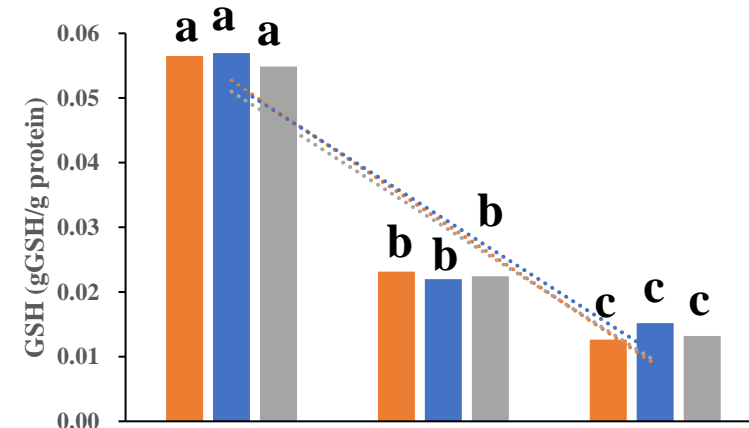

(E)

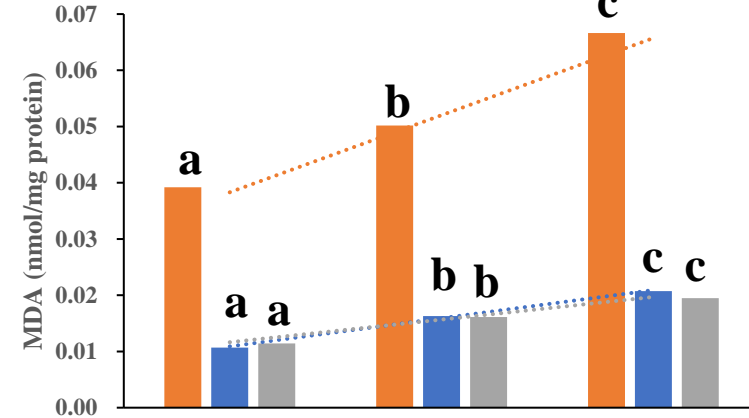

(F)

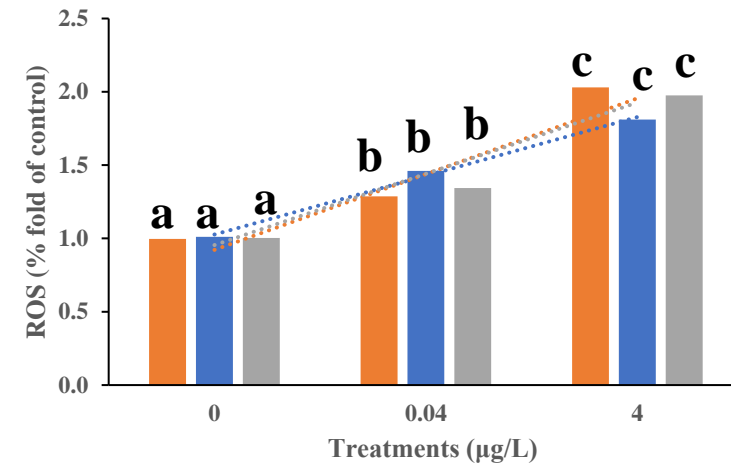

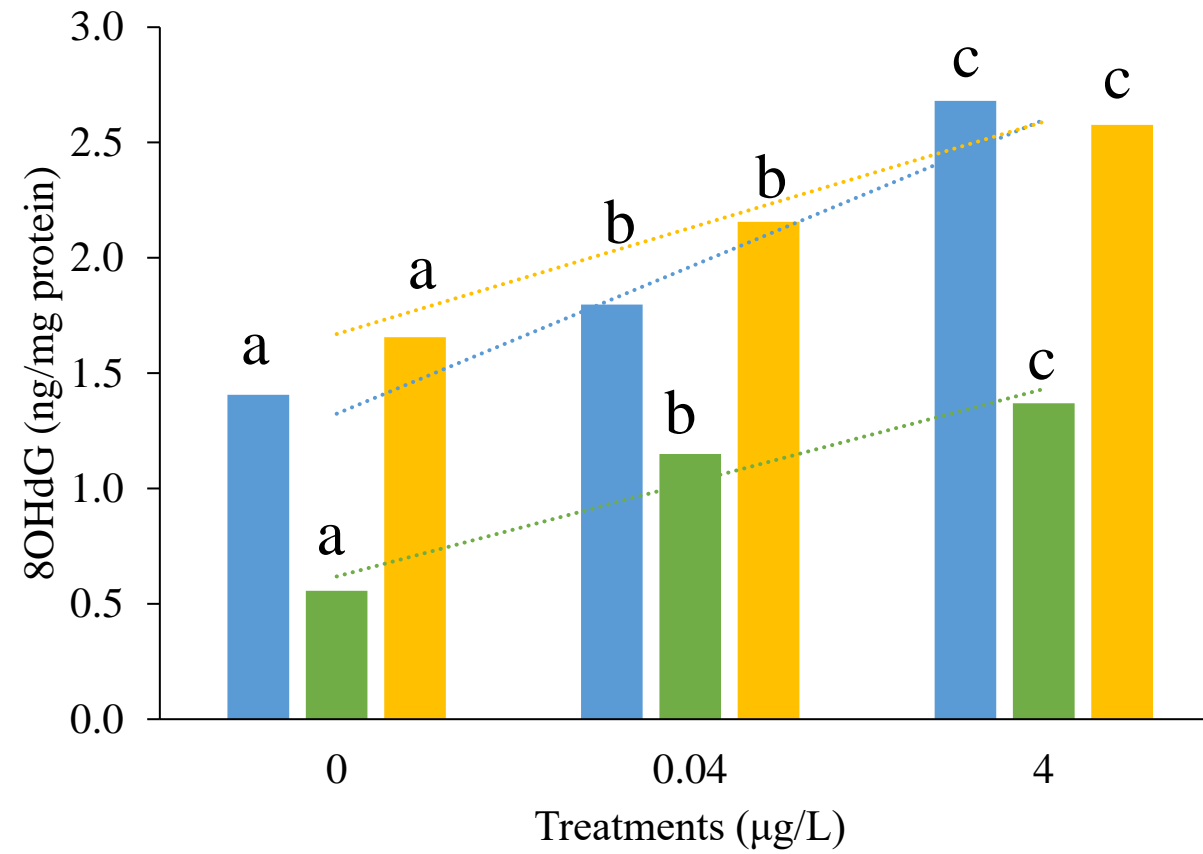

(A)

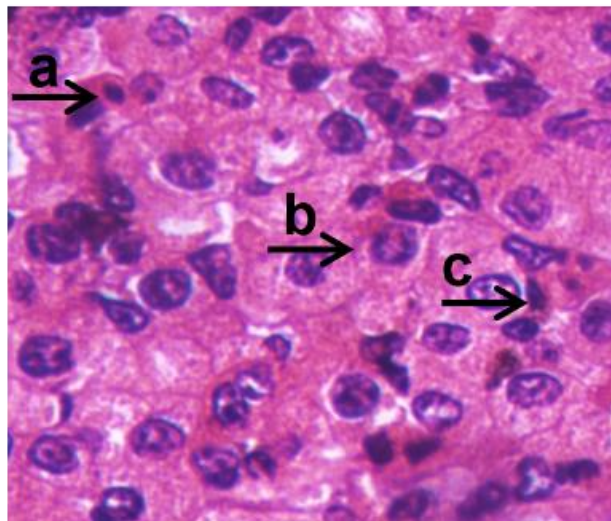

(B)

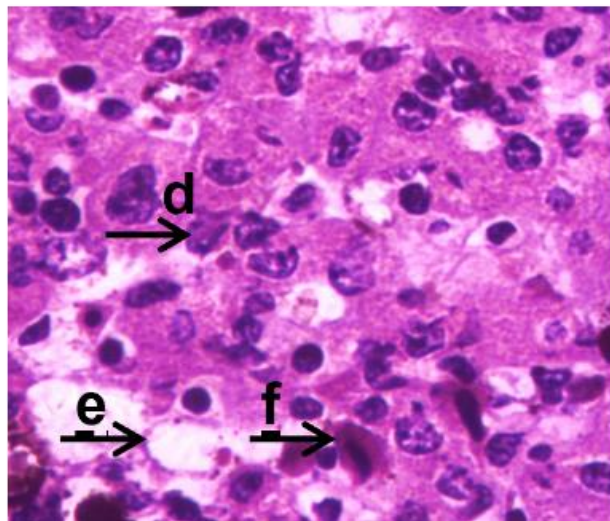

(C)

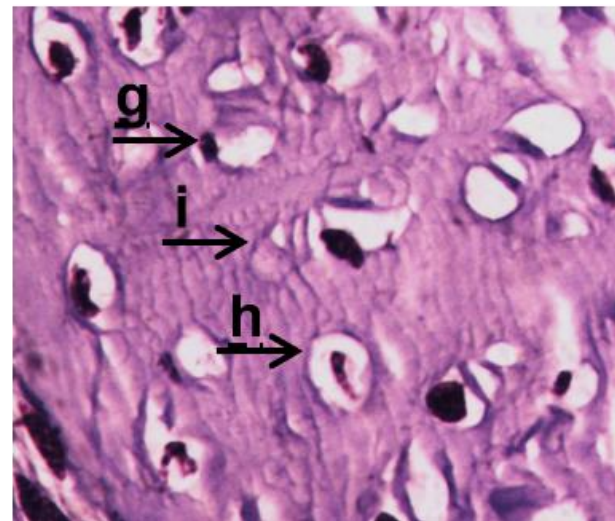

**(A)**

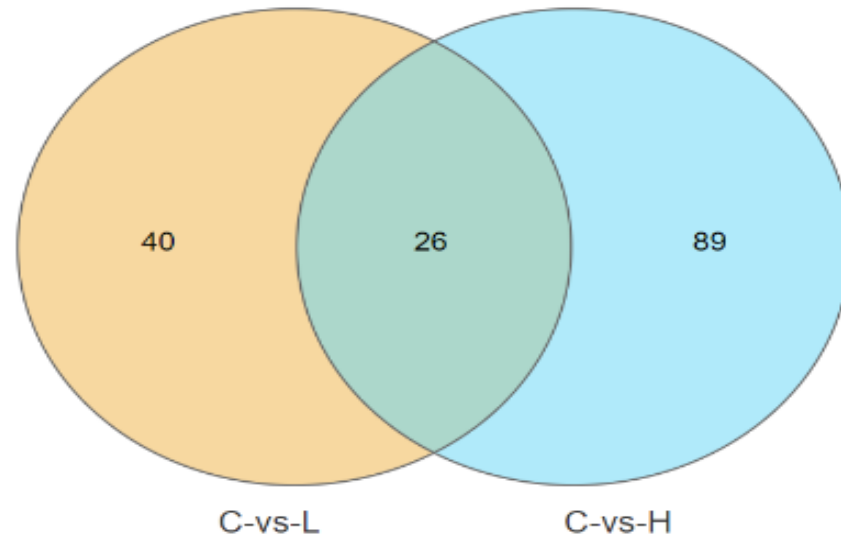

**(B)**

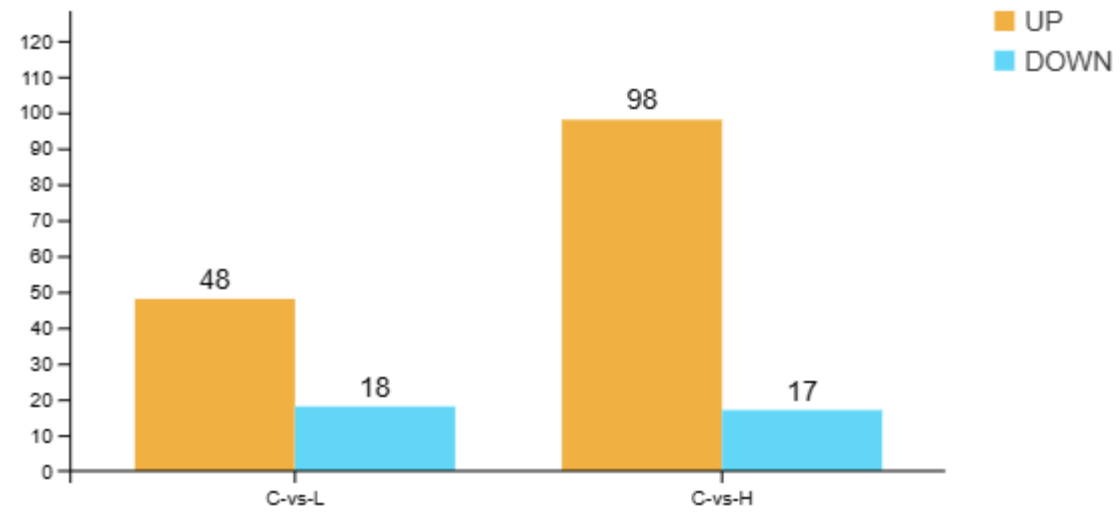

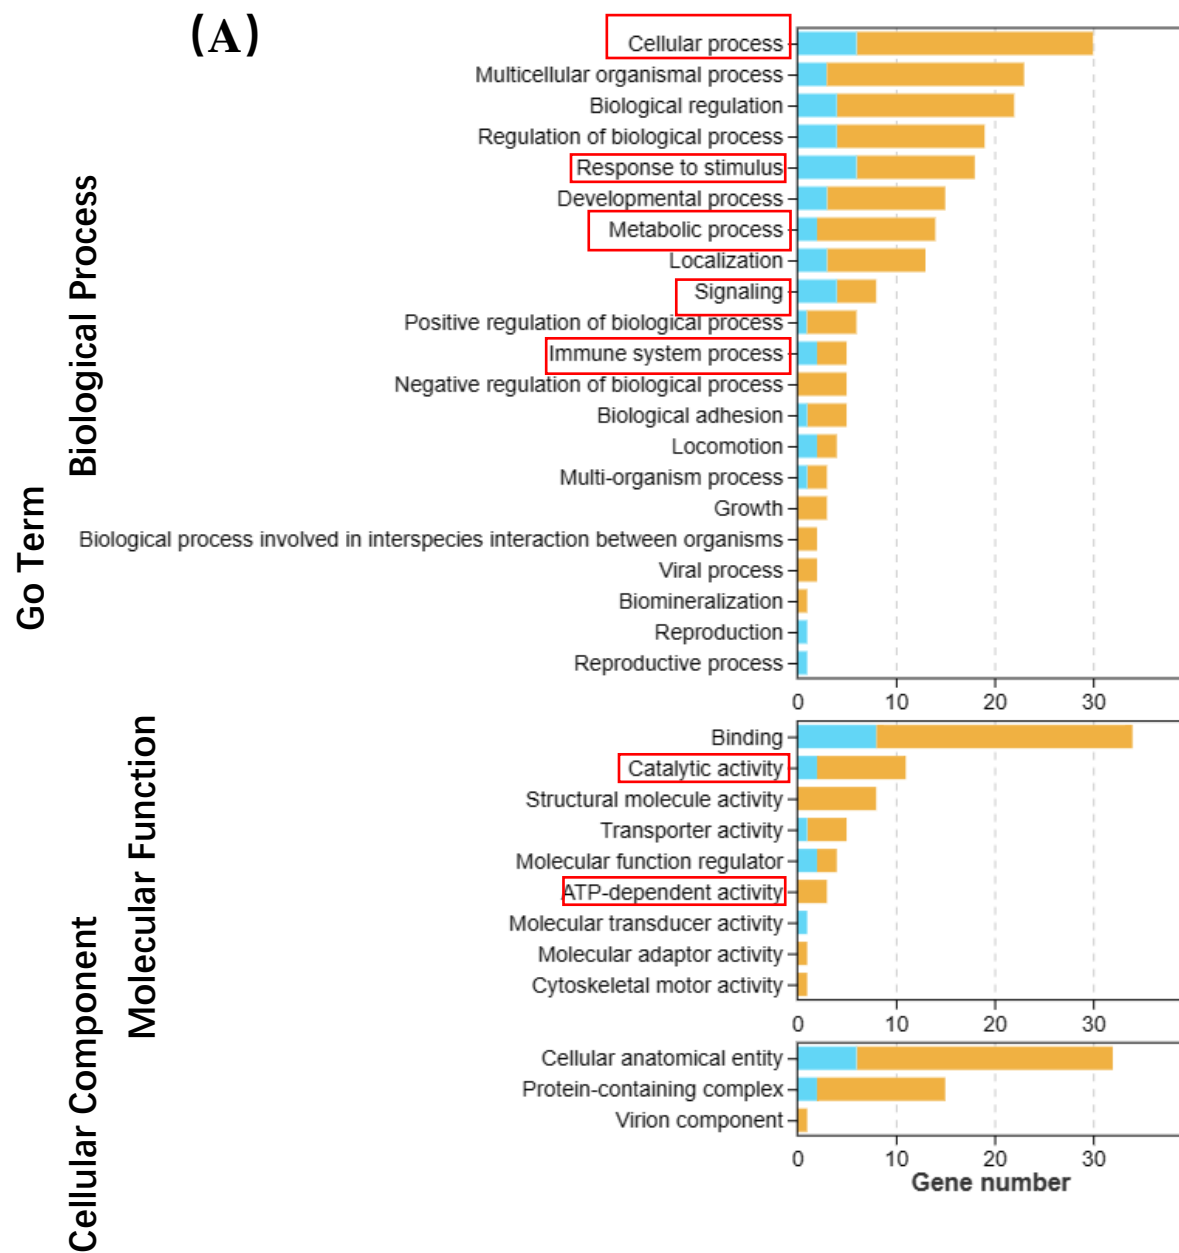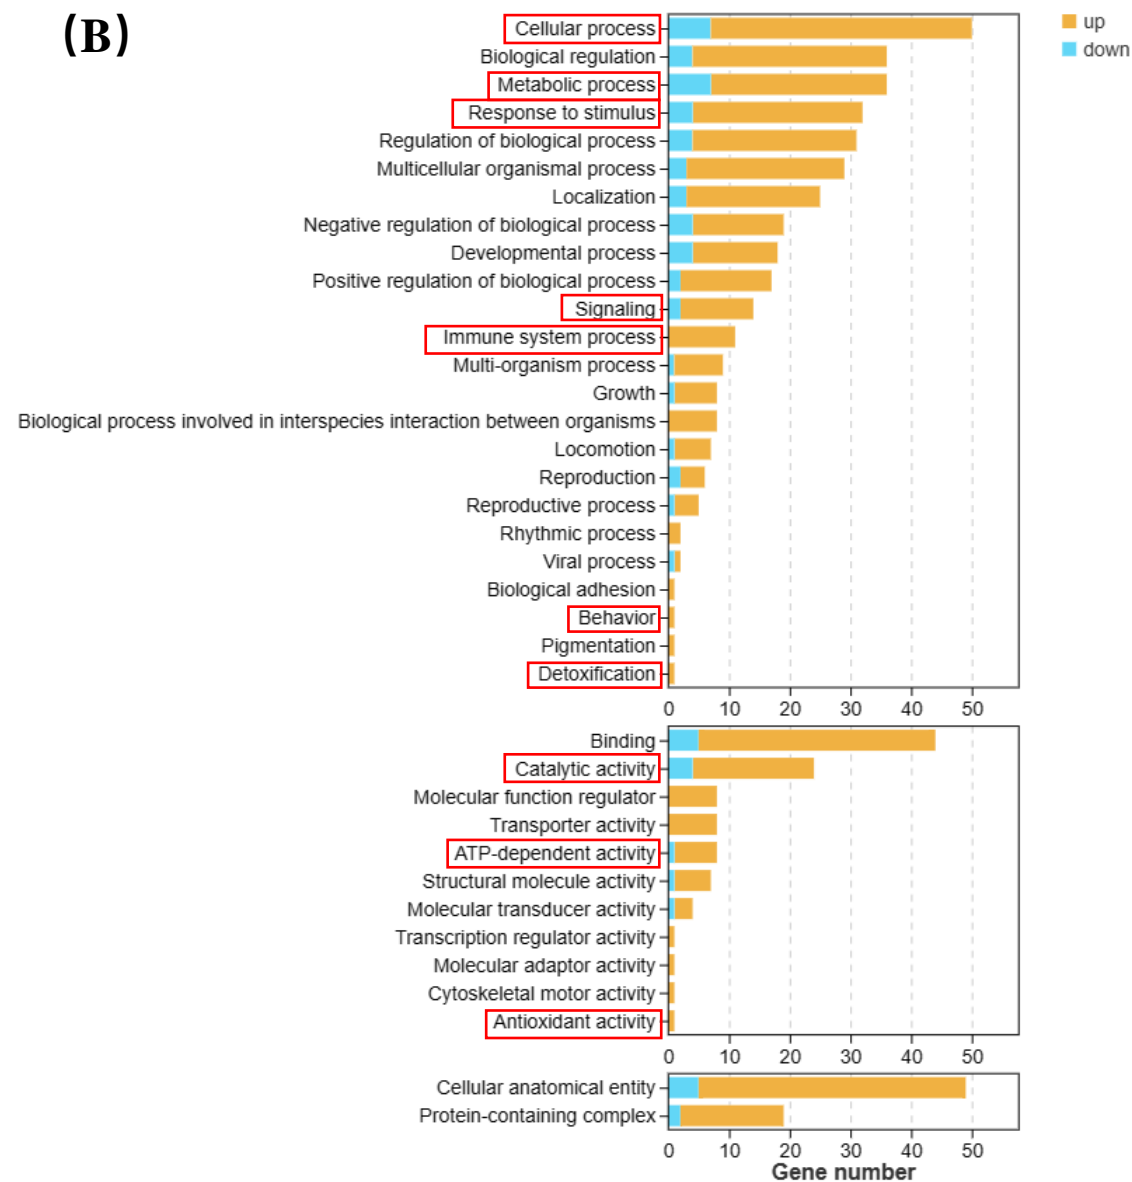

(A)

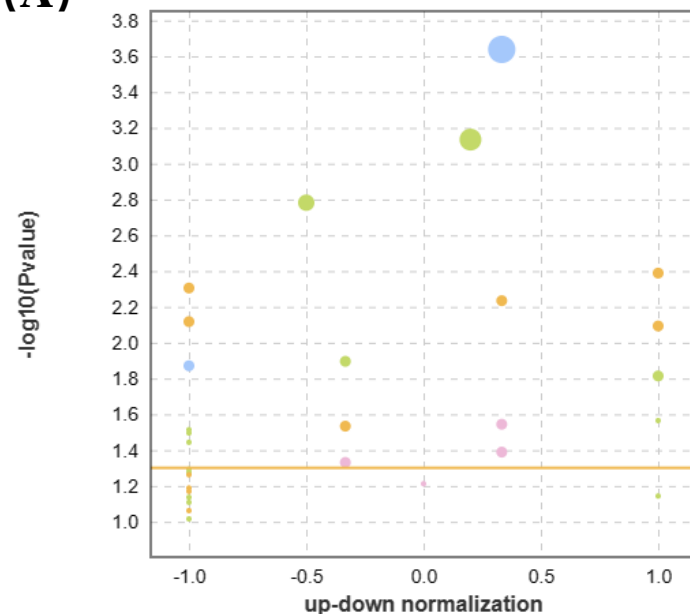

Category: ● Environmental Information Processing ● Human Diseases ● Organismal Systems ● Cellular Processes

pathway top20

| ID      | Description                                     | Number |
|---------|-------------------------------------------------|--------|
| ko04020 | Calcium signaling pathway                       | 6      |
| ko05414 | Dilated cardiomyopathy                          | 5      |
| ko05323 | Rheumatoid arthritis                            | 4      |
| ko04260 | Cardiac muscle contraction                      | 3      |
| ko04672 | Intestinal immune network for IgA production    | 3      |
| ko04670 | Leukocyte transendothelial migration            | 3      |
| ko04662 | B cell receptor signaling pathway               | 3      |
| ko04261 | Adrenergic signaling in cardiomyocytes          | 3      |
| ko05150 | Staphylococcus aureus infection                 | 3      |
| ko04064 | NF-kappa B signaling pathway                    | 3      |
| ko05410 | Hypertrophic cardiomyopathy                     | 3      |
| ko05412 | Arrhythmogenic right ventricular cardiomyopathy | 2      |
| ko04810 | Regulation of actin cytoskeleton                | 3      |
| ko04613 | Neutrophil extracellular trap formation         | 3      |
| ko05143 | African trypanosomiasis                         | 2      |
| ko05340 | Primary immunodeficiency                        | 2      |
| ko05310 | Asthma                                          | 2      |
| ko04510 | Focal adhesion                                  | 3      |
| ko04145 | Phagosome                                       | 3      |
| ko05330 | Allograft rejection                             | 2      |

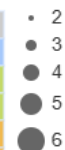

(B)

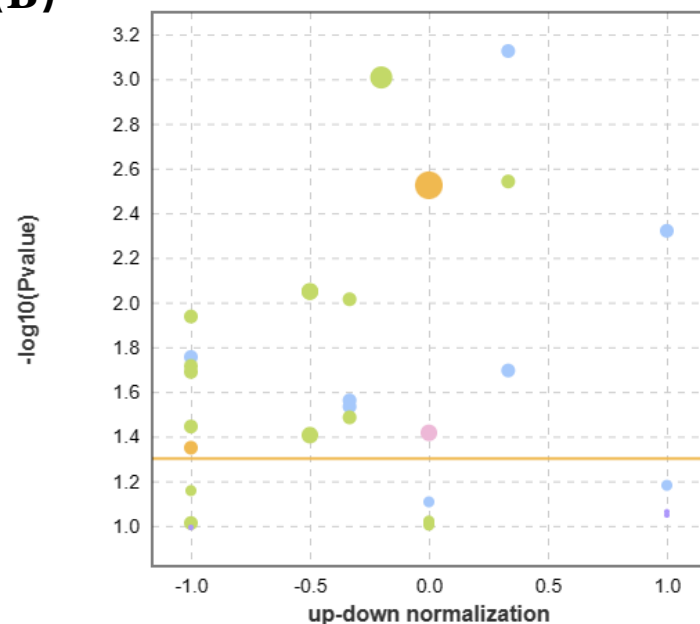

Category: ● Organismal Systems ● Human Diseases ● Environmental Information Processing ● Cellular Processes ● Metabolism

pathway top20

| ID      | Description                                  | Number |
|---------|----------------------------------------------|--------|
| ko04975 | Fat digestion and absorption                 | 3      |
| ko05150 | Staphylococcus aureus infection              | 5      |
| ko05321 | Inflammatory bowel disease                   | 3      |
| ko04020 | Calcium signaling pathway                    | 6      |
| ko03320 | PPAR signaling pathway                       | 3      |
| ko05323 | Rheumatoid arthritis                         | 4      |
| ko05416 | Viral myocarditis                            | 4      |
| ko05340 | Primary immunodeficiency                     | 3      |
| ko05310 | Asthma                                       | 3      |
| ko04672 | Intestinal immune network for IgA production | 3      |
| ko05330 | Allograft rejection                          | 3      |
| ko04612 | Antigen processing and presentation          | 3      |
| ko05320 | Autoimmune thyroid disease                   | 3      |
| ko04650 | Natural killer cell mediated cytotoxicity    | 3      |
| ko04640 | Hematopoietic cell lineage                   | 3      |
| ko05140 | Leishmaniasis                                | 3      |
| ko05322 | Systemic lupus erythematosus                 | 3      |
| ko04145 | Phagosome                                    | 4      |
| ko05169 | Epstein-Barr virus infection                 | 4      |
| ko04064 | NF-kappa B signaling pathway                 | 3      |

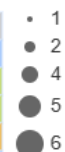

Supplement: Supplementary file 1 [file CGS table and figure_SJ20231004.pdf › manuscript & tables & figures/CGS table and figure_SJ20231004.pdf]
